# Supplementary material
Source: publisher figshare collection journal article supplement (https://acs.figshare.com/ndownloader/files/4302547)
Supplement: Supplementary file 1 [file 4302547]

**Supporting Information:**

# High Efficiency Solid-state Dye-sensitized Solar Cells Using Hierarchically Structured TiO<sub>2</sub> Nanofibers

*Daesub Hwang,<sup>1</sup> Seong Mu Jo,<sup>1</sup> Dong Young Kim,<sup>1</sup> Vanessa Armel,<sup>2</sup> Douglas R.*

*MacFarlane,<sup>2</sup> Sung-Yeon Jang<sup>1\*</sup>*

<sup>1</sup>Polymer Hybrids Center, Korea Institute of Science and Technology, Seoul, Korea

<sup>2</sup>Australian Centre for Electromaterials Science, School of Chemistry, Monash University,  
Clayton, VIC 3800, Australia

## **CORRESPONDING AUTHOR FOOTNOTE**

Current address: Department of Chemistry, Kookmin University, Seoul, Korea

E-mail: syjang@kookmin.ac.kr, Tel: +82- 2- 910- 5768, Fax: +82- 2- 910- 4415

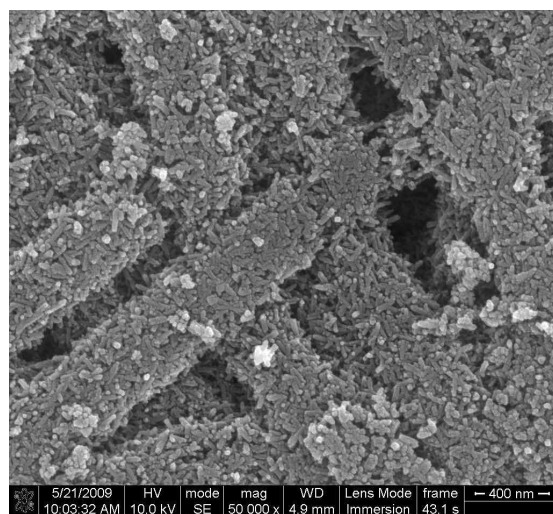

**Figure S1.** SEM image of the HS-NFs after dye loading.

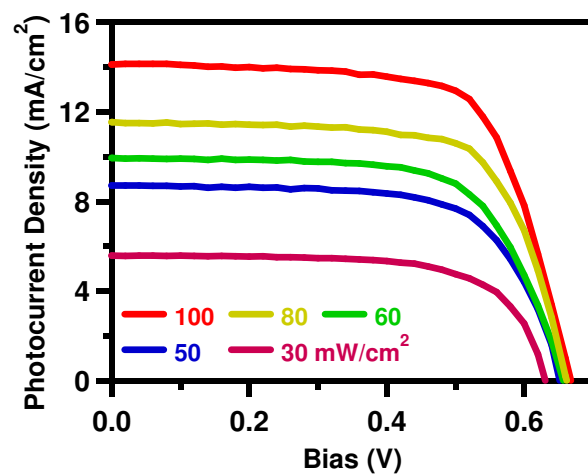

**Figure S2.** *J-V* curves of the DSSC-NFs under simulated AM 1.5G at the diverse light intensities.

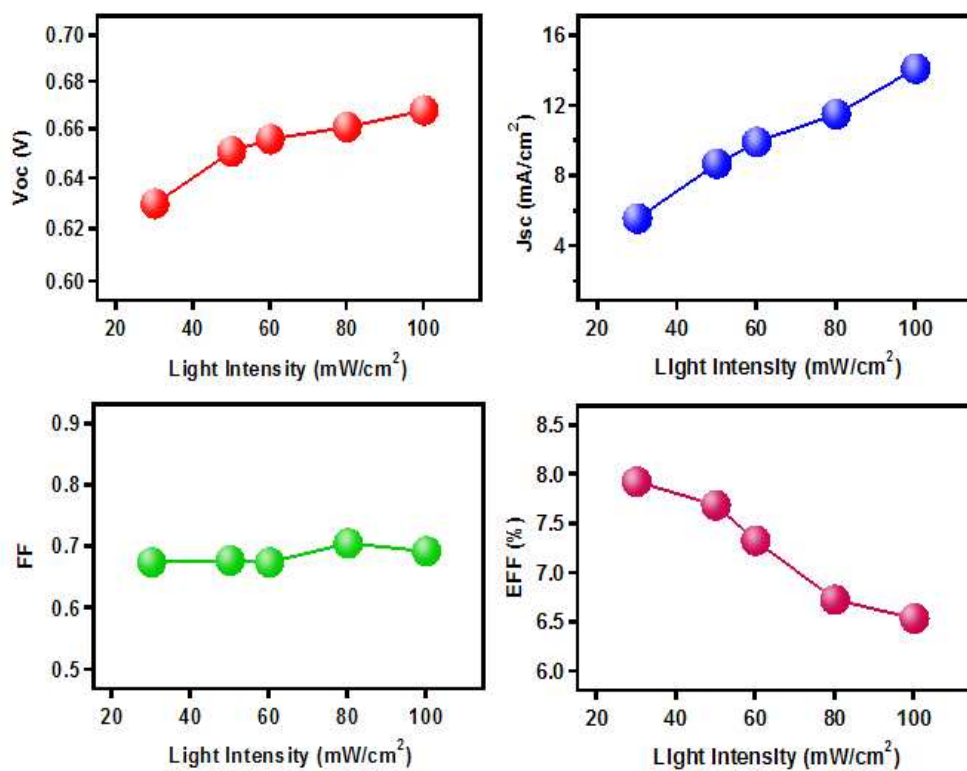

**Figure S3.** The photovoltaic properties of the DSSC-NFs with respect to under simulated AM 1.5G at the diverse light intensities.
